# Supplementary material
Source: PubMed Central journal article supplement (PMC5562515)
Supplement: NIHMS856459-supplement.pdf [file NIHMS856459-supplement.pdf]

**Appendix Figure 1.** Flow diagram of cohort ascertainment, Kaiser Permanente Northern California 2007-2012.

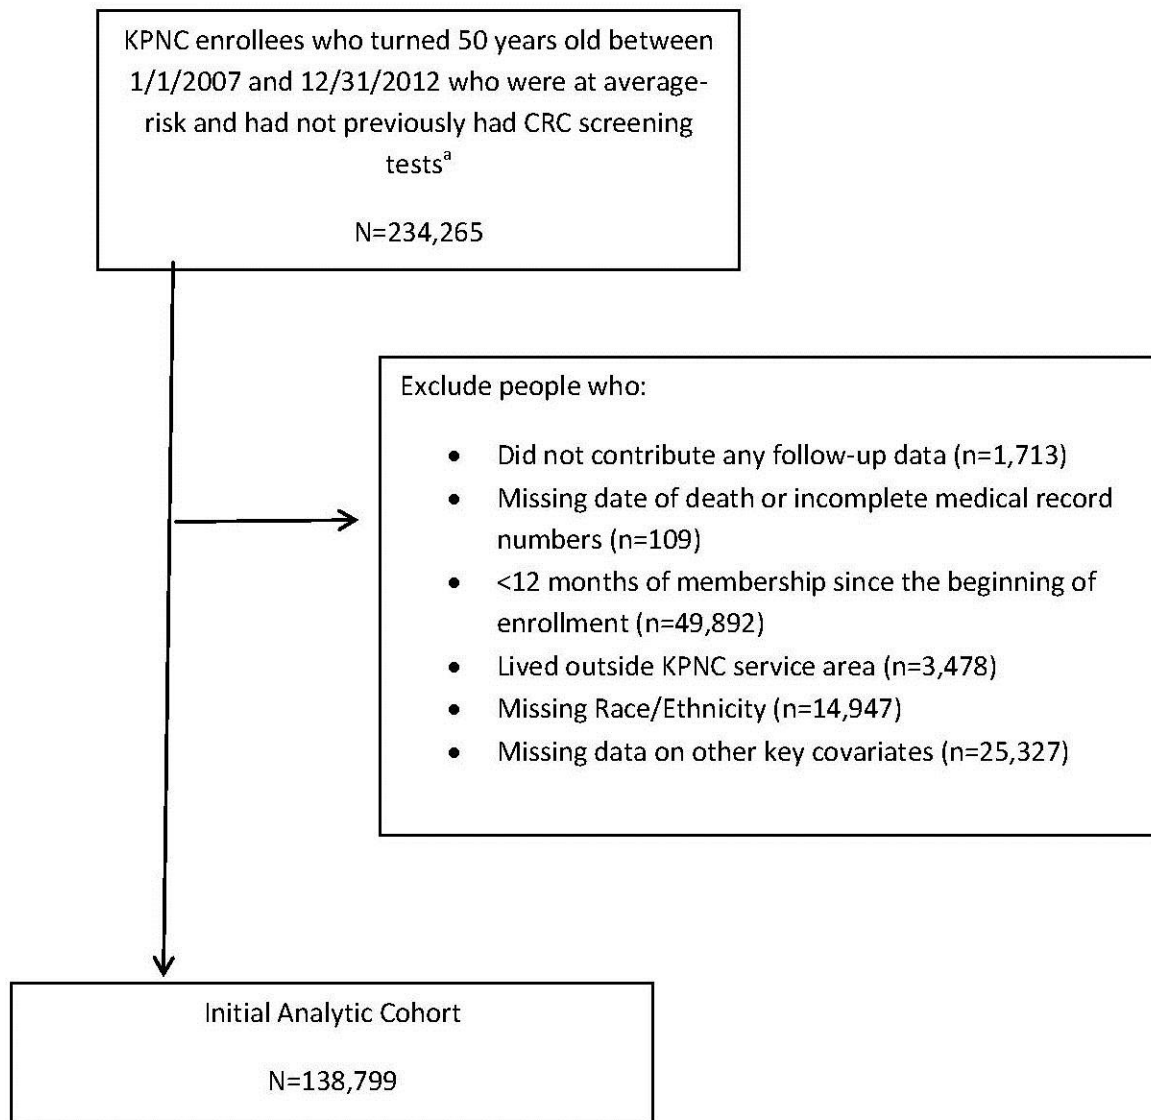

<sup>a</sup>People with a strong family history, were diagnosed with inflammatory bowel disease, were diagnosed with CRC or had colorectal cancer surgery before their 50th birthday were considered non-average risk.

**Appendix**  
**Colorectal Cancer Screening Initiation After Age 50 Years in an Organized Program**  
**Fedewa et al.**

**Appendix Table 1.** Sub-Distribution Hazard Models of Colorectal Cancer Screening Among Newly Eligible Enrollees, Kaiser Permanente Northern California 2007-2012

| Race/Ethnicity  | Any CRC screening <sup>a</sup> |             |             | FIT <sup>b</sup> |             |             | Colonoscopy <sup>c</sup> |             |             | Sigmoidoscopy <sup>d</sup> |             |             |
|-----------------|--------------------------------|-------------|-------------|------------------|-------------|-------------|--------------------------|-------------|-------------|----------------------------|-------------|-------------|
|                 | SHR                            | 95% CI      |             | SHR              | 95% CI      |             | SHR                      | 95% CI      |             | SHR                        | 95% CI      |             |
| White           | 1.00                           |             |             | 1.00             |             |             | 1.00                     |             |             | 1.00                       |             |             |
| Black           | 0.99                           | 0.97        | 1.02        | <b>0.91</b>      | <b>0.89</b> | <b>0.93</b> | <b>1.15</b>              | <b>1.05</b> | <b>1.25</b> | <b>1.45</b>                | <b>1.36</b> | <b>1.55</b> |
| Hispanic        | <b>0.96</b>                    | <b>0.94</b> | <b>0.98</b> | 0.98             | 0.96        | 1.00        | <b>0.90</b>              | <b>0.84</b> | <b>0.96</b> | 1.00                       | 0.95        | 1.06        |
| Asian           | <b>1.15</b>                    | <b>1.14</b> | <b>1.17</b> | <b>1.12</b>      | <b>1.11</b> | <b>1.14</b> | <b>0.92</b>              | <b>0.86</b> | <b>0.98</b> | <b>1.12</b>                | <b>1.06</b> | <b>1.19</b> |
| Native American | 0.93                           | 0.84        | 1.02        | 0.99             | 0.89        | 1.10        | 0.60                     | 0.36        | 1.03        | e                          |             |             |
| Multiple races  | 1.01                           | 0.93        | 1.09        | 0.99             | 0.91        | 1.08        | 0.60                     | 0.79        | 1.52        | e                          |             |             |

Note: Boldface indicates statistical significance ( $p < 0.05$ ).

<sup>a</sup> Sub-Distribution Hazard Model examines any type of CRC screening versus no screening, people who died were considered as having a competing event. Adjusted for year of 50th birthday, gender, insurance, language preference, BMI category, Charlson Comorbidity, family history, service area, Census-tract poverty.

<sup>b</sup> Sub-Distribution Hazard Model examines FIT testing versus no testing, people who died or received colonoscopy or sigmoidoscopy were considered as having competing event. Adjusted for year of 50th birthday, gender, insurance, language preference, BMI category, Charlson Comorbidity, family history, service area, Census-tract poverty.

<sup>c</sup> Sub-Distribution Hazard Model examines colonoscopy versus no testing, people who died or received FIT or sigmoidoscopy were considered as having a competing event. Adjusted for year of 50th birthday, gender, insurance, language preference, BMI category, Charlson Comorbidity, family history, service area, Census-tract poverty.

<sup>d</sup> Sub-Distribution Hazard Models examines sigmoidoscopy versus no testing, people who died or received FIT or colonoscopy were considered as having a competing event.

<sup>e</sup>Estimates were unstable.

CRC, colorectal cancer; FIT, fecal immunochemical test; SHR, sub-hazard ratio

**Appendix**  
**Colorectal Cancer Screening Initiation After Age 50 Years in an Organized Program**  
**Fedewa et al.**

**Appendix Table 2.** Log-Binomial Models of Colorectal Cancer Screening Among Newly Eligible Enrollees, Kaiser Permanente Northern California 2007-2012

| Race/Ethnicity  | Any CRC screening <sup>a</sup> |             |             | FIT <sup>b</sup> |             |             | Colonoscopy <sup>c</sup> |             |             | Sigmoidoscopy <sup>d</sup> |             |             |
|-----------------|--------------------------------|-------------|-------------|------------------|-------------|-------------|--------------------------|-------------|-------------|----------------------------|-------------|-------------|
|                 | PR                             | 95% CI      |             | PR               | 95% CI      |             | PR                       | 95% CI      |             | PR                         | 95% CI      |             |
| White           | 1.00                           |             |             | 1.00             |             |             | 1.00                     |             |             | 1.00                       |             |             |
| Black           | 0.99                           | 0.99        | 1.00        | <b>0.97</b>      | <b>0.95</b> | <b>0.98</b> | 1.05                     | 0.97        | 1.14        | <b>1.23</b>                | <b>1.15</b> | <b>1.31</b> |
| Hispanic        | <b>0.99</b>                    | <b>0.98</b> | <b>0.99</b> | <b>0.98</b>      | <b>0.97</b> | <b>0.99</b> | <b>0.83</b>              | <b>0.78</b> | <b>0.89</b> | <b>1.08</b>                | <b>1.03</b> | <b>1.14</b> |
| Asian           | <b>1.03</b>                    | <b>1.02</b> | <b>1.04</b> | <b>1.04</b>      | <b>1.03</b> | <b>1.05</b> | 0.82                     | 0.77        | 0.88        | <b>1.12</b>                | <b>1.07</b> | <b>1.19</b> |
| Native American | 0.97                           | 0.93        | 1.01        | 0.98             | 0.93        | 1.04        | 0.63                     | 0.37        | 1.05        | 0.95                       | 0.67        | 1.33        |
| Multiple races  | 1.00                           | 0.98        | 1.03        | 1.00             | 0.96        | 1.05        | 1.08                     | 0.79        | 1.47        | 0.97                       | 0.75        | 1.26        |

*Note:* Boldface indicates statistical significance ( $p < 0.05$ ).

<sup>a</sup>Log Binomial Model examines any type of CRC screening versus no screening before the end of follow-up and is adjusted for year of 50th birthday, gender, insurance, language preference, BMI category, Charlson Comorbidity, family history, service area, Census-tract poverty.

<sup>b</sup>Log Binomial Model examines FIT testing versus no testing before the end of follow-up and is adjusted for year of 50th birthday, gender, insurance, language preference, BMI category, Charlson Comorbidity, family history, service area, Census-tract poverty.

<sup>c</sup>Log Binomial Model examines colonoscopy versus no testing before the end of follow-up and is adjusted for year of 50th birthday, gender, insurance, language preference, BMI category, Charlson Comorbidity, family history, service area, Census-tract poverty.

<sup>d</sup>Log Binomial Model examines sigmoidoscopy versus no testing before the end of follow-up and is adjusted for year of 50th birthday, gender, insurance, language preference, BMI category, Charlson Comorbidity, family history, service area, Census-tract poverty.

KPNC, Kaiser Permanente Northern California; CRC, colorectal cancer; FIT, fecal immunochemical test; PR, prevalence ratio

**Appendix**  
**Colorectal Cancer Screening Initiation After Age 50 Years in an Organized Program**  
**Fedewa et al.**

**Appendix Table 3.** Colorectal Cancer Screening Within 2 Years of 50th Birthday, Kaiser Permanente Northern California 2007-2012

| Race/Ethnicity  | Any CRC screening <sup>a</sup> |             |             | FIT <sup>b</sup> |             |             | Colonoscopy <sup>c</sup> |             |             | Sigmoidoscopy <sup>d</sup> |             |             |
|-----------------|--------------------------------|-------------|-------------|------------------|-------------|-------------|--------------------------|-------------|-------------|----------------------------|-------------|-------------|
|                 | PR                             | 95% CI      |             | PR               | 95% CI      |             | PR                       | 95% CI      |             | PR                         | 95% CI      |             |
| White           | 1.00                           |             |             | 1.00             |             |             | 1.00                     |             |             | 1.00                       |             |             |
| Black           | <b>0.97</b>                    | <b>0.96</b> | <b>0.99</b> | <b>0.96</b>      | <b>0.94</b> | <b>0.97</b> | 0.98                     | 0.87        | 1.11        | <b>1.09</b>                | <b>1.03</b> | <b>1.16</b> |
| Hispanic        | <b>0.96</b>                    | <b>0.95</b> | <b>0.97</b> | <b>0.96</b>      | <b>0.95</b> | <b>0.97</b> | <b>0.79</b>              | <b>0.71</b> | <b>0.87</b> | 0.97                       | 0.92        | 1.02        |
| Asian           | <b>1.05</b>                    | <b>1.04</b> | <b>1.05</b> | <b>1.05</b>      | <b>1.04</b> | <b>1.06</b> | 0.96                     | 0.88        | 1.05        | <b>1.20</b>                | <b>1.15</b> | <b>1.26</b> |
| Native American | 0.94                           | 0.88        | 1.00        | 0.94             | 0.88        | 1.01        | 0.61                     | 0.30        | 1.26        | 0.85                       | 0.61        | 1.20        |
| Multiple races  | 1.00                           | 0.95        | 1.04        | 0.99             | 0.94        | 1.04        | 1.24                     | 0.80        | 1.91        | 1.00                       | 0.78        | 1.27        |

*Note:* Boldface indicates statistical significance ( $p < 0.05$ ).

<sup>a</sup>Log Binomial Model examines any type of CRC screening versus no screening within 2 years of a person's 50th birthday and is adjusted for year of 50th birthday, gender, insurance, language preference, BMI category, Charlson Comorbidity, family history, service area, Census-tract poverty.

<sup>b</sup>Log Binomial Model examines FIT testing versus no testing within 2 years of a person's 50th birthday and is adjusted for year of 50th birthday, gender, insurance, language preference, BMI category, Charlson Comorbidity, family history, service area, Census-tract poverty.

<sup>c</sup>Log Binomial Model examines colonoscopy versus no testing within 2 years of a person's 50th birthday and is adjusted for year of 50th birthday, gender, insurance, language preference, BMI category, Charlson Comorbidity, family history, service area, Census-tract poverty.

<sup>d</sup>Log Binomial Model examines sigmoidoscopy versus no testing within 2 years of a person's 50th birthday and is adjusted for year of 50th birthday, gender, insurance, language preference, BMI category, Charlson Comorbidity, family history, service area, Census-tract poverty.

KPNC, Kaiser Permanente Northern California; CRC, colorectal cancer; FIT, fecal immunochemical test; PR, prevalence ratio

**Appendix**  
**Colorectal Cancer Screening Initiation After Age 50 Years in an Organized Program**  
**Fedewa et al.**

**Appendix Table 4.** Colorectal Cancer Screening Among Enrollees Not Screened by 51st Birthday, Kaiser Permanente Northern California 2007-2012<sup>a</sup>

| Race/Ethnicity  | Receipt of any CRC testing |             |             | Receipt of FIT testing |             |             |
|-----------------|----------------------------|-------------|-------------|------------------------|-------------|-------------|
|                 | HR                         | 95% CI      |             | HR                     | 95% CI      |             |
| White           | 1.00                       |             |             | 1.00                   |             |             |
| Black           | 0.97                       | 0.93        | 1.00        | <b>0.94</b>            | <b>0.90</b> | <b>0.98</b> |
| Hispanic        | <b>0.94</b>                | <b>0.91</b> | <b>0.96</b> | <b>0.92</b>            | <b>0.90</b> | <b>0.95</b> |
| Asian           | <b>1.09</b>                | <b>1.06</b> | <b>1.12</b> | <b>1.09</b>            | <b>1.06</b> | <b>1.12</b> |
| Native American | 0.98                       | 0.84        | 1.14        | 1.00                   | 0.85        | 1.17        |
| Multiple races  | 0.96                       | 0.85        | 1.10        | 0.97                   | 0.84        | 1.11        |

*Note:* Boldface indicates statistical significance ( $p < 0.05$ ).

<sup>a</sup>Cox Proportional Hazard Models are adjusted for language, gender, insurance, BMI, family history, poverty, comorbidity, service area and receipt of a mailed FIT kit. Includes 67,721 people who had not been screened by their 51st birthday.

HR, hazard ratio; FIT, fecal immunochemical test

**Appendix Table 5.** Models of Fecal Immunochemical Testing Among Enrollees Mailed a Kit, Kaiser Permanente Northern California 2007-2012<sup>a</sup>

| Race/Ethnicity  | Receipt of FIT testing |             |             |
|-----------------|------------------------|-------------|-------------|
|                 | HR                     | 95% CI      |             |
| White           | 1.00                   |             |             |
| Black           | <b>0.95</b>            | <b>0.92</b> | <b>0.97</b> |
| Hispanic        | <b>0.94</b>            | <b>0.92</b> | <b>0.96</b> |
| Asian           | <b>1.14</b>            | <b>1.12</b> | <b>1.16</b> |
| Native American | 0.93                   | 0.83        | 1.04        |
| Multiple races  | 0.99                   | 0.91        | 1.09        |

*Note:* Boldface indicates statistical significance ( $p < 0.05$ ).

<sup>a</sup>Cox Proportional Hazard Model is adjusted for language, gender, insurance, BMI, family history, poverty, comorbidity, and service area. Includes 119,925 people.

HR, hazard ratio, FIT fecal immunochemical test

**Appendix**  
**Colorectal Cancer Screening Initiation After Age 50 Years in an Organized Program**  
**Fedewa et al.**

**Appendix Table 6.** Method of Testing Among Enrollees Receiving Fecal Immunochemical Testing, KPNC 2007-2012

| Categories      | Outreach      | In-reach      | <i>p</i> -value |
|-----------------|---------------|---------------|-----------------|
|                 | N (%)         | N (%)         |                 |
| Total           | 69,725 (77.4) | 20,416 (22.6) |                 |
| Race/Ethnicity  |               |               |                 |
| White           | 40,299 (78.5) | 11,048 (21.5) | <b>0.0001</b>   |
| Black           | 5,359 (78.1)  | 1,503 (21.9)  |                 |
| Hispanic        | 11,798 (77.2) | 3,489 (22.8)  |                 |
| Asian           | 11,662 (73.5) | 4,206 (26.5)  |                 |
| Native American | 239 (77.9)    | 68 (22.1)     |                 |
| Multiple races  | 368 (78.3)    | 102 (21.7)    |                 |

*Note:* Boldface indicates statistical significance ( $p < 0.05$ ).

KPNC, Kaiser Permanente Northern California
